# Supplementary material for: An effective signal enhancement strategy for sensing cysteine based on aluminium-initiated emission
Source: Royal Society of Chemistry journal article supplement (doi:10.1039/c7ay02026k), 2017-01-01
Supplement: c7ay02026k1.pdf [file c7ay02026k1.pdf]

## Electronic Supplementary Information

### **An effective signal enhancement strategy for sensing cysteine based on aluminium-initiated emission**

Wu Zou<sup>a</sup>, Xuejiao Chen<sup>a</sup>, Cheng Huan<sup>b</sup>, Tingting Gu<sup>a</sup>, Jiaoyun Xia<sup>a</sup> and Fuchun Gong<sup>a\*</sup>

<sup>a</sup>College of Chemistry and Biologic Engineering, Changsha University of Science and  
Technology, Changsha, 410114, China

<sup>b</sup>Hunan Institute of Animal and Veterinary Science, Changsha, 410131, China

\* Corresponding author: Fuchun Gong

Tel.: +86-731- 85258733

Fax.: +86-731-85258733

E. mail : [gongfc139@163.com](mailto:gongfc139@163.com)

[gongfc@csust.edu.cn](mailto:gongfc@csust.edu.cn)

## **Section 1.** Synthesis of S-DPM

**Fig. S1.**  $^1\text{H}$  NMR of S-DPM reacted with Cys

**Fig. S2.** Plot of the fluorescence intensities as a function of Cys concentration.

**Fig. S3.** Optimization of sensing for Cys

**Table S1.** Determination of the fluorescence quantum yield of DPM, S-DPM and  $\text{DPM-Al}^{3+}$

## **References**

## Section 1. Synthesis of S-DPM

### 1.1. Synthesis of 2'-hydroxychalcone

An appropriate amount of benzaldehyde (2.12 g, 20 mmol) and 2'-hydroxyacetophenone (2.72 g, 20 mmol) were put in 35 mL EtOH with stirring until complete dissolution. Then, 5.6 g potassium hydroxide(100 mmol) was added. The reaction mixture was stirred at room temperature for 12 h. After that, the reaction mixture was poured into a 100 mL ice water, acidified with cold 18%HCl (pH = 4), extracted with ethylacetate (3×80 mL). The organic layer was washed with water and brine, followed by drying over anhydrous Na<sub>2</sub>SO<sub>4</sub> and then the solvent was evaporated. The residues was purified by column chromatography on a silica gel column (*n*-hexane: ethylacetate, 7:3). The organic solvents were removed by evaporation to give a faint yellow solid 3.24 g (67.5%). IR (KBr)  $\nu_{\max}$  (cm<sup>-1</sup>): 3400 (b, OH), 3058.89, 2925.88, 1658.67 (C=O), 1602.74, 1564.16, 1488.94 (C=C), 1217.00 (C-O). <sup>1</sup>H-NMR (400 MHz, DMSO-d<sub>6</sub>):  $\delta$ H (ppm): 11.50 (1H, s, C2'-OH), 8.25 (d, 1H, H-6, J = 7.32 Hz), 8.06 (d, 1H, H- $\beta$ , vinylic, J = 15.60 Hz), 7.95 (d, 2H, H-2', H-6', J = 8.72 Hz), 7.82 (d, 1H, H- $\alpha$ , vinylic, J = 16.00 Hz), 7.56 (m, 3H, H-3, H-4, H-5), 7.00 (d, 2H, H-3', H-5', J = 8.28 Hz). <sup>13</sup>C-NMR (75MHz, DMSO-d<sub>6</sub>):  $\delta$ C (ppm): 193.50, 161.90, 143.28, 136.45, 135.49, 133.43, 130.96, 130.87, 129.03, 122.51, 120.71, 119.20, 117.75. QTOF-MSES<sup>+</sup>: [M<sup>+</sup>]<sup>+</sup>(in ESI) = 224.25 (100%); Analysis calculated for C<sub>15</sub>H<sub>12</sub>O<sub>2</sub>: C, 80.20%; H, 6.68%; Found: C, 80.16%; H, 6.70%.

### 1.2. Synthesis of 2'-hydroxyldihydropyrimidobenzimidazole (DPM)

DPM was prepared according to ref.[1] with a minor modification. An

appropriate amount of 2'-hydroxychalcone (2.24 g, 10.0 mmol) and 2-aminobenzimidazole (1.33 g, 10.0 mmol) were stirred in ethanol (50 mL). After dissolution, 5.6 g potassium hydroxide (250.0 mmol) was added to it. The reaction mixture was heated in an oil bath at 76 °C for 6h. After cooling to room temperature, the pH of the reaction mixture was adjusted to 7 by the addition of concd. HCl. After removal of organic solvents, the resulting brown residue was dissolved in ethyl acetate, and the solution was washed with brine. After evaporation of organic layers, the residue was dissolved in a minimal amount of CH<sub>2</sub>Cl<sub>2</sub> and charged onto a silica gel column packed with CH<sub>2</sub>Cl<sub>2</sub>. The column was eluted stepwise with ethyl acetate-petroleum ether (7:3). The organic solvents were removed by evaporation to give a faint brown solid 1.74 g(52.6%). DPM: brown crystals mp:122~123 °C. IR (KBr)  $\nu_{\max}$ (cm<sup>-1</sup>)3580, 3410 (b,OH), 3376, 3318,(C=N) 2180, 2240, 2838, 2256(C=N), 1673, 1576, 1511, 1489(C=C), 1369, 1315, 1259(C-O), 1225, 1174, 1116, 1077, 1035, 1009, 853, 839, 810, 789, 748, 726(C-H). <sup>1</sup>HNMR  $\delta$ : 8.01 (s, 2H), 7.57–7.31 (m, 6H), 5.88 (s, 2H), 3.88 (ddd, J = 13.9, 9.4, 6.1 Hz, 2H), 2.87–2.70 (m, 1H), 1.67–1.43 (m, 2H), 1.30 (dt, J = 14.7, 7.3 Hz, 3H), 0.87 (t, J = 7.3 Hz, 3H); <sup>13</sup>C NMR (75 MHz, CDCl<sub>3</sub>):  $\delta$  118.1, 120.3, 121.7, 123.9, 124.8, 125.6, 127.9, 129.1, 129.3, 130.2, 131.2, 131.8, 136.6, 157.2, 154.6, 178.5. MS (ESI): m/z 362.42 [M<sup>+</sup>Na]<sup>+</sup>. Analysis calculated for C<sub>22</sub>H<sub>17</sub>N<sub>3</sub>O(339.42):C, 77.80%; H, 5.00%; N, 12.37%. Found: C, 77.81%; H, 5.07%; N, 12.35%.

### 1.3. Synthesis of S-DPM

2-(2'-oxo-(2,4-dinitrobenzenesulfonyl)-phenyl)-3,4-dihydro-4-(phenyl)-

pyrimido[1,2-a]-benzimidazole(S-DPM) was synthesized according to previous typical literature[2] with minor modifications. 2,4-dinitrobenzenesulfonyl chloride (2.67 g, 10mmol) was added to a mixture of compound 2 and Et<sub>3</sub>N (20 mmol) in dichloromethane(80 mL). The resulting solution was stirred for 4 h at room temperature. After completion of the reaction, the mixture was washed with brine (25 mL×3) and the organic layer was dried over MgSO<sub>4</sub>. After filtered, the solvent was evaporated under reduced pressure. The residues was purified by column chromatography on silica gel with 5:2 petroleum ether:ethyl acetate (v/v) to afford probe S-DPM(2.8 g, 75.1%) as a pale yellow solid. M.P. 162–164 °C; IR (KBr, cm<sup>-1</sup>): 3301, 3023, 2896, 1669, 1579; <sup>1</sup>H NMR (300 MHz, DMSO-d<sub>6</sub>): δ 3.08 (dd, 1H, J = 6.3, 17.4 Hz, CH<sub>2</sub>), 3.90 (dd, 1H, J = 8.4, 8.7 Hz, CH<sub>2</sub>), 5.45 (dd, 1H, J = 6.3, 8.9 Hz, 5-H of pyrimidine), 6.70 (t, 1H, J = 7.2 Hz, Ar-H), 6.98 (d, 2H, J = 7.8 Hz, Ar-H), 7.15 (dd, 2H, J = 7.5, 8.7 Hz, Ar-H), 7.69–7.76(m, 4H, Ar-H), 7.41–7.67 (m, 6H, Ar-H); <sup>13</sup>CNMR (75 MHz, DMSO-d<sub>6</sub>): 163.1, 146.9, 144.3, 142.6, 139.4, 131.7, 128.9, 128.8, 127.4, 127.3, 127.1, 126.4, 125.8, 119.2, 118.4, 112.8, 63.1, 43.1; HRMS: calcd for [M + H]<sup>+</sup> C<sub>30</sub>H<sub>25</sub>N<sub>5</sub>SO<sub>7</sub>: 573.12; found: 573.05. Analysis calculated for C<sub>30</sub>H<sub>25</sub>N<sub>5</sub>S O<sub>7</sub>: C, 62.93%; H, 4.41%; N, 12.21%, O, 16.78%. Found: C, 62.94%; H, 4.37%; N, 12.22%, O, 16.75%.

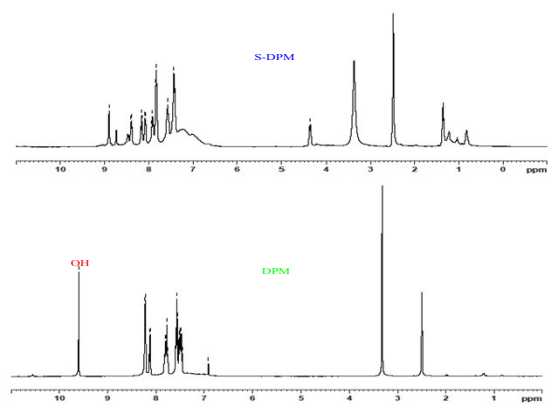

**Fig. S1**  $^1\text{H}$  NMR of S-DPM reacted with Cys

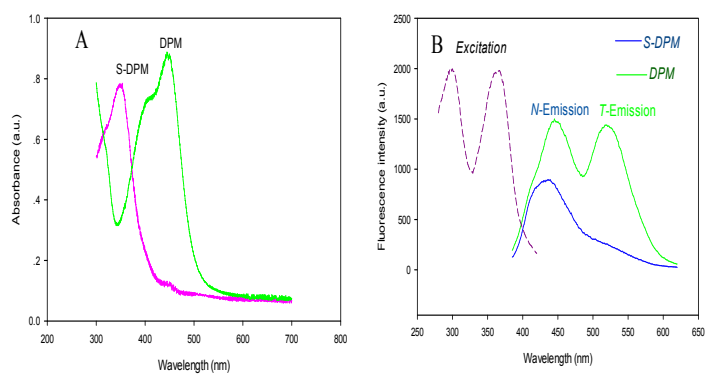

**Fig. S2** UV-vis spectra (A) and fluorescence spectra changes (B) of 30  $\mu$ M DPM and S-DPM in ethanol-HEPES solutions (pH 7.4, 2:3, v/v). Excitation wavelength is 365 nm.

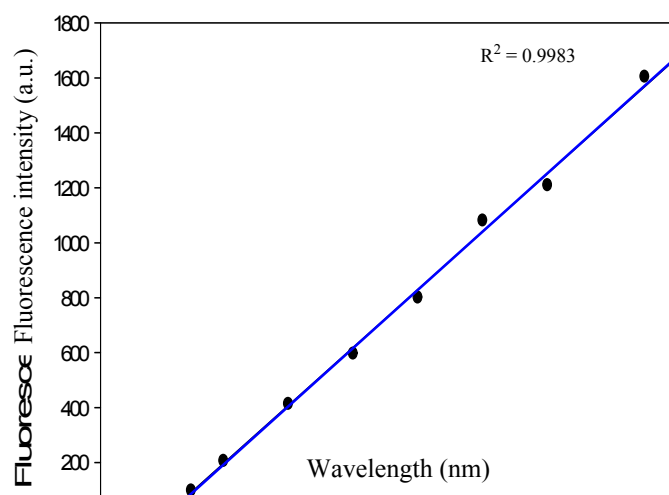

**Fig. S3** Linear relationship between the fluorescence emission peaking at 521 (under 365 nm excitation) of S-DPM and Cys concentrations in the range of 1-150  $\mu\text{M}$  at pH 7.4.



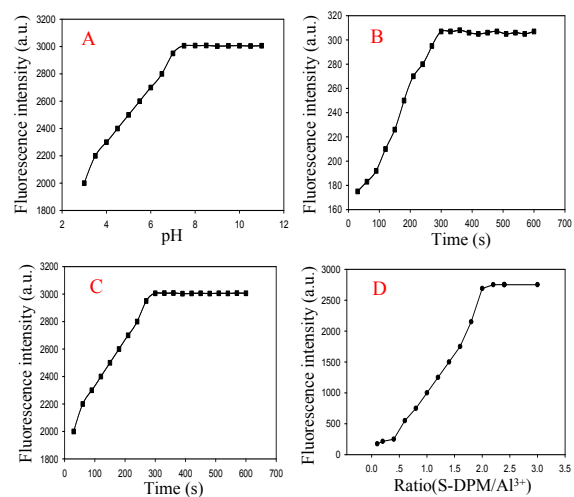

**Fig. S4** (A) Fluorescence responses of the S-DPM at different pH values. (B) Recovery time of S-DPM with the addition of Cys. (C) The time of fluorescence enhancement of S-DPM after adding a 25  $\mu\text{M}$   $\text{Al}^{3+}$  solution. (D) The ratio of S-DPM to  $\text{Al}^{3+}$ .

**Table S1** Determination of the fluorescence quantum yield(FQY) of DPM, S-DPM and DPM-Al<sup>3+</sup>

| Sample               | Solvent  | FQY   |
|----------------------|----------|-------|
| DPM                  | ethanol- | 0.173 |
| S-DPM                | ethanol- | 0.006 |
| DPM-Al <sup>3+</sup> | ethanol- | 0.865 |

Absorbance in the 1 cm fluorescence cuvette were kept under 0.1 at the excitation wavelength of 360 nm. The analytes quinine sulfate, DPM, S-DPM and DPM-Al<sup>3+</sup> were dissolved in the ethanol-HEPES solutions (10 mM, pH 7.4, v/v = 2:3). The ESIPT emission of DPM was used to estimate its FQY.

#### References

- (1) Mohamed, A.M.; Eee, E.M.K.; Fathy, A.A. *J. Indian. Chem. Soc.* **1987**, *64*, 753-755.
- (2) Majumdar, P.; Zhao, J.Z. *J. Phys. Chem. B.* **2015**, *119*, 2384-2394.
